# 1 **Fragile X Syndrome Carrier Screening Using a Nanopore Sequencing Assay**

2 Running title: FXS Carrier Screening using Nanopore Sequencing

3 Zhongmin Xia<sup>a,†</sup>, Qiuxiao Deng<sup>a,b,†</sup>, Ping Hu<sup>c,†</sup>, Chunliu Gao<sup>d</sup>, Yu Jiang<sup>e</sup>, Yulin Zhou<sup>a,b,\*</sup>, and

4 Qiwei Guo<sup>a,b,\*</sup>

5 <sup>a</sup>Department of Medical Genetics, Women and Children's Hospital, School of Medicine,

6 Xiamen University, Xiamen, Fujian, China.

7 <sup>b</sup>School of Medicine, Xiamen University, Xiamen, Fujian, China.

8 <sup>c</sup>Department of Prenatal Diagnosis, Women's Hospital of Nanjing Medical University,

9 Nanjing Women and Children's Healthcare Hospital, Nanjing, Jiangsu, China.

10 <sup>d</sup>School of Public Health, Xiamen University, Xiamen, Fujian, China.

11 <sup>e</sup>Molecular Diagnostic Laboratory for Precision Medicine, Xiang'an Hospital of Xiamen

12 University, School of Medicine, Xiamen University, Xiamen, Fujian, China.

13 <sup>†</sup>Zhongmin Xia, Qiuxiao Deng, and Ping Hu contributed equally to this work.

14 \*Correspondence to:

15 Qiwei Guo, Department of Medical Genetics, Women and Children's Hospital, School of

16 Medicine, Xiamen University, Xiamen, Fujian, China. Tel: +86-592-7805028. Email:

17 [guoqiwei@xmu.edu.cn](mailto:guoqiwei@xmu.edu.cn)

18 Yulin Zhou, Department of Medical Genetics, Women and Children's Hospital, School of

19 Medicine, Xiamen University, Xiamen, Fujian, China. Tel: +86-592-7805028. Email:

20 [zhou\\_yulin@126.com](mailto:zhou_yulin@126.com)

21 Keywords: AGG interruption, carrier screening, CGG repeat, fragile X syndrome, nanopore

22 sequencing

**NOTE: This preprint reports new research that has not been certified by peer review and should not be used to guide clinical practice.**

23 Word count: 2969

24 Figures: 4

25 Tables: 2

26 Nonstandard abbreviations: FXS, fragile X syndrome; TP-PCR, triplet-primed PCR.

27 Human gene: *FMRI*, fragile X messenger ribonucleoprotein 1.

28 **BACKGROUND:** Fragile X syndrome (FXS) is the leading cause of monogenic autism  
29 spectrum disorder and inherited intellectual disabilities. Although the value of  
30 population-based FXS carrier screening has been acknowledged, appropriate screening  
31 methods are urgently required to establish and implement screening programs.

32 **METHODS:** We developed a nanopore sequencing-based assay that includes data analysis  
33 software to identify FXS carriers. Reference and clinical samples were used to evaluate the  
34 performance of our nanopore sequencing assay. Triplet-primed PCR and PacBio long-read  
35 sequencing were used for comparisons.

36 **RESULTS:** Nanopore sequencing identified reference carrier samples with a full range of  
37 premutation alleles in single-, 10-, and 100-plex assays, and identified AGG interruptions in  
38 an allele-specific manner. Nanopore sequencing revealed no size preference for amplicons  
39 containing different length CGG repeat regions. Finally, nanopore sequencing successfully  
40 identified three carriers among ten clinical samples for preliminary clinical validation. The  
41 observed variation in CGG repeat region size resulted from the base-calling process of  
42 nanopore sequencing.

43 **CONCLUSIONS:** Our nanopore sequencing assay is rapid, high-capacity, inexpensive, and  
44 easy to perform, thus providing a promising tool and paving the way for population-based  
45 FXS carrier screening.

## 46 **Introduction**

47 Fragile X syndrome (FXS) (#MIM300624) is the leading cause of monogenic autism  
48 spectrum disorders and inherited intellectual disability, affecting approximately 1/7,000  
49 females and 1/4,000 males worldwide (1, 2). The causative gene of FXS is fragile X  
50 messenger ribonucleoprotein 1 (*FMRI*), an X-linked dominant gene with full penetrance in all  
51 males and many females that plays a fundamental role in synapse formation and normal  
52 dendrite development (3, 4). *FMRI* can be categorized into four allelic forms based on the  
53 number of CGG trinucleotide repeats in its 5' untranslated region: (a) normal alleles contain  
54 ~5 to ~44 repeats and are stable in meiosis or mitosis; (b) intermediate alleles contain ~45 to  
55 ~54 repeats and during intergenerational transmission, their repeat number can change slightly;  
56 (c) premutation alleles contain ~55 to ~200 repeats and can expand to full mutation during  
57 maternal transmission to offspring; premutation alleles are associated with risk of fragile  
58 X-associated primary ovarian insufficiency, fragile X-associated tremor/ataxia syndrome, and  
59 fragile X-associated neuropsychiatric disorders; (d) full mutation alleles have more than 200  
60 repeats that frequently accompany hypermethylation in adjacent CpG islands and in the repeat  
61 region itself, which silences transcription and causes most cases of FXS (4). Asymptomatic  
62 women with pre-mutation or full mutation alleles are thus termed FXS carriers because their  
63 offspring are at risk of FXS (5). The prevalence of FXS carriers varies among different  
64 populations, ranging from approximately 1/149 in Israel to approximately 1/581 in East Asia  
65 (6-9). In many cases, CGG repeats are interrupted by one or more AGG trinucleotides (i.e.,  
66 AGG interruptions), which can prevent strand slippage during replication, thus functioning as  
67 a protective factor that decreases the risk of intergenerational CGG expansion (9). Evaluation

68 of AGG interruptions among CGG repeats is thus essential for genetic counseling, especially  
69 for FXS carriers (4).

70 Owing to the severe morbidity of FXS, carrier screening, and subsequent prenatal  
71 diagnosis are still warranted for this disease until the development of effective treatments (4,  
72 10). Although all major ethnic groups and races appear to be susceptible to FXS, and FXS  
73 carrier prevalence is high, whether FXS carrier screening should be offered to the general  
74 population has long been a subject of debate (5, 9, 11-13). We previously showed that  
75 population-based carrier screening is the dominant strategy for FXS intervention in East Asia  
76 (9). Recently, population-based pan-ethnic FXS carrier screening was officially endorsed by  
77 the American College of Medical Genetics and Genomics (10). Clinical interest has shifted  
78 from “whether to perform” to “how to perform” population-based FXS carrier screening. An  
79 assay to capably address this issue should be able to examine a large number of female  
80 samples with high accuracy, low cost, short turnaround time, and ease of performance.

81 FXS genetic testing was performed using Southern blotting, a labor-intensive method  
82 that allows estimation of CGG expansion size but cannot accurately quantitate CGG repeat  
83 number and AGG interruption patterns (4). These drawbacks have been overcome with the  
84 triplet-primed PCR (TP-PCR) assay, which has become the mainstay method in clinical use,  
85 with several kits, including AmpliDeX™ *FMR1* PCR Kit (Asuragen) and Molecular Fragile X  
86 PCR Kit (Biofast) commercially available (4, 14). Typing AGG interruptions at the allelic  
87 level in female samples with TP-PCR remains challenging. Long-read sequencing-based  
88 assays for FXS genetic testing using Nanopore and PacBio sequencing have recently been  
89 developed (15-19). Theoretically, with the ability to directly sequence entire CGG repeats

90 and/or the full-length *FMR1* gene, long-read sequencing-based assays enable quantitative  
91 evaluation of CGG repeat number, AGG interruptions, rare intragenic variants, and large  
92 deletions in a single allele, dramatically advancing genetic diagnosis of FXS (16). To date, the  
93 clinical utility of long-read sequencing-based assays for population-based screening of FXS  
94 carriers has not been demonstrated.

95 In this study, we developed a nanopore sequencing assay that includes data analysis  
96 software and demonstrated its clinical potential as a promising tool for population-based FXS  
97 carrier screening.

## 98 **Materials and Methods**

### 99 **SAMPLES**

100 Eight (P2, P3, P4, P5, N1, N2, N3, and N4) and two (NA06968 and NA20239) reference  
101 samples with known *FMR1* genotypes were obtained from the National Institutes for Food  
102 and Drug Control of China and the Coriell Institute, respectively (20, 21). P3, P4, NA06968,  
103 and NA20239 provide genomic DNA from FXS carriers with different extents of CGG  
104 expansion, and N1, N2, N3, and N4 provide genomic DNA from women with normal *FMR1*  
105 alleles. N1/P2 and N1/P5 mixtures represent genomic DNA from women carrying CGG  
106 repeats near the intermediate/premutation boundary (Supplemental Table 1).

107 The genomic DNA of ten women whose *FMR1* genotypes have been examined via  
108 clinical FXS genetic testing was obtained from the Department of Prenatal Diagnosis,  
109 Women's Hospital of Nanjing Medical University. Signed informed consent was obtained  
110 from each participant to authorize the use of their genetic data for research purposes. This  
111 study was approved by the Research Ethics Committee of Xiamen University.

## 112 **AMPLIFICATION OF *FMRI* ALLELES**

113 The CGG repeats and flanking sequences of *FMRI* were amplified using a T100 Thermal  
114 Cyclor (Bio-Rad, Hercules, CA, USA). A 50- $\mu$ L reaction containing 1 $\times$  Expand Long  
115 Template buffer 2 (Roche Diagnostics, Mannheim, Germany), 3.75U Expand Long Template  
116 Enzyme mix (Roche Diagnostics, Mannheim, Germany), 0.5 mmol/L dNTPs (Takara, Kyoto,  
117 Japan), 2.2 mol/L Betaine (SIGMA-Aldrich, Saint Louis, Missouri, USA), 0.33 mmol/L of  
118 each forward and reverse primer (Sangon, Shanghai, China), and 50 ng DNA template. Primer  
119 information and amplification conditions are listed in Supplemental Tables 2 and 3,  
120 respectively. After amplification, PCR products were purified with a TIANquick Midi  
121 Purification Kit (TIANGEN, Beijing, China) and subsequently quantified with a Qubit<sup>TM</sup>  
122 dsDNA HS Assay Kit (Invitrogen, Carlsbad, CA, USA) on a Qubit<sup>TM</sup> fluorometer  
123 (ThermoFisher Scientific, Waltham, Massachusetts, USA) according to the respective  
124 manufacturers' instructions.

## 125 **LIBRARY PREPARATION AND NANOPORE SEQUENCING**

126 Library preparation and nanopore sequencing methods are described in detail in Supplemental  
127 Methods.

## 128 **DATA ANALYSIS SOFTWARE**

129 Based on the previously described STRique software (15), we developed data analysis  
130 software to facilitate the identification of CGG repeat numbers and AGG interruptions for  
131 FXS carrier screening in our nanopore sequencing assay. The logic of software is described in  
132 detail in Supplemental Methods; the software code was licensed by Xiamen University and is  
133 available at <https://github.com/guoqiwei-xmu/FXS-carrier-identifier.git>.

134 **TP-PCR ASSAY**

135 A CE-certified AmplideX™ FMR1 PCR Kit (Asuragen, Minneapolis, Minnesota, USA) and a  
136 Chinese Food and Drug Administration-approved Molecular Fragile X PCR Kit (Biofast,  
137 Xiamen, Fujian, China) were used as comparative methods. Respective assays were  
138 performed on a T100 Thermal Cycler (Bio-Rad, Hercules, CA, USA) and a 3500 DX Genetic  
139 Analyzer (Applied Biosystems, Waltham, Massachusetts, USA), according to the  
140 manufacturers' instructions.

141 **CAFXS ASSAY**

142 A long-read sequencing-based method termed the CAFXS assay, was used as a comparative  
143 method and performed by a commercial service (Berry Genomics, Beijing, China). The  
144 principle of CAFXS has been previously described (16).

145 **Results**

146 **DESIGN OF NANOPORE SEQUENCING ASSAY FOR FXS CARRIER SCREENING**

147 As illustrated in Fig. 1, our nanopore sequencing assay comprises three steps: pre-sequencing  
148 preparation, nanopore sequencing, and post-sequencing data analysis. During pre-sequencing  
149 preparation, CGG repeats and flanking sequences of each sample are amplified with a pair of  
150 primers containing a specific identifier sequence at each strand's 5' end. These primers allow  
151 the specific identifier sequence to be integrated into the amplicon of each sample to enable the  
152 analysis of multiple samples in a single sequencing assay. After purification and quantification,  
153 amplicons are pooled to achieve equal masses to prepare the sequencing library. After  
154 nanopore sequencing of the library, post-sequencing data analysis is performed using novel  
155 data analysis software. Briefly, the nucleotide sequence of each read is translated from a raw



156 ionic current signal (base calling), and qualified reads that contain correct identifier, prefix,  
157 and suffix sequences, are retained for further analysis. Next, the CGG repeat numbers of  
158 qualified reads are evaluated based on the distance between prefix and suffix sequences. After,  
159 the presence and position of AGG interruptions are evaluated for each qualified read. For each  
160 sample, the distribution of reads with different CGG repeat numbers and AGG statuses is  
161 analyzed. Finally, the CGG repeat number and AGG status of a specific allele are determined  
162 based on the peaks generated from the aggregated reads with similar CGG repeat numbers  
163 and AGG patterns. When an allele with a CGG repeat number over the threshold (e.g., 54 or  
164 55) is identified, an alarm is triggered to flag an FXS carrier.

#### 165 **VALIDATION OF NANOPORE SEQUENCING ASSAY BY EXAMINING FXS**

#### 166 **CARRIERS WITH VARIOUS CGG REPEAT NUMBERS AND AGG**

#### 167 **INTERRUPTION PATTERNS**

168 We first validated the nanopore sequencing assay by examining FXS carriers with various  
169 numbers of CGG repeats and AGG interruption patterns in a single-plex manner. Reference  
170 samples were used as FXS carriers, and TP-PCR and CAFXS were used as methods for  
171 comparison. As shown in Fig. 2, nanopore sequencing identified a wide range of expanded  
172 alleles. AGG interruption patterns were identified in an allele-specific manner. A slight  
173 discordance between nanopore sequencing and comparative method results was observed in  
174 the reported CGG repeat numbers of expanded alleles (Table 1). Due to a one CGG repeat  
175 difference between methods, the N1/P5 sample was designated as a non-carrier by the  
176 nanopore sequencing assay but a carrier by comparative methods.

#### 177 **DETECTION OF FXS CARRIERS FROM WILDTYPE BACKGROUNDS WITH**

## 178 **THE MULTIPLEX NANOPORE SEQUENCING ASSAY**

179 We next evaluated whether the nanopore sequencing assay could examine multiple samples  
180 simultaneously and distinguish FXS carriers from wild-type backgrounds, as shown in Fig. 1.  
181 Ten pairs of primers labeled with different identifier sequences were designed, validated, and  
182 used to amplify ten respective samples (Fig. 3A and Supplemental Table 2). As illustrated in  
183 Fig. 1, amplicons were pooled to achieve equal masses for library preparation and nanopore  
184 sequencing. Nanopore sequencing successfully detected a wide range of expanded alleles in  
185 the 10-plex assay (Fig. 3B-G).

186 We assessed whether the nanopore sequencing assay could simultaneously examine more  
187 samples (e.g., 100 samples). Instead of using 100 identifier sequences to identify 100 different  
188 samples, we mimicked the scenario by decreasing the pooling proportion of the six target  
189 amplicons to 6% (1% each), while increasing the pooling proportion of the four wild-type  
190 amplicons to 94% (23.5% each). Similar to the results of the 10-plex assay, the 100-plex assay  
191 successfully detected all expanded alleles within wild-type backgrounds (Fig. 3H-M).

## 192 **INACCURATE BASE CALLING ATTRIBUTED TO VARIATIONS IN CGG REPEAT** 193 **QUANTIFICATION**

194 Although the nanopore sequencing assay was able to detect various FXS carriers, the reported  
195 CGG repeat numbers of expanded alleles differed slightly from those of the comparative  
196 methods (Table 1). Moreover, for a specific reference sample, the reported CGG repeat  
197 numbers of the expanded alleles were slightly discordant among the different nanopore  
198 sequencing assays (Fig. 4A). To investigate the potential causes of these variations, we  
199 manually examined the sequences of 20 random reads with fewer CGG repeats than those

200 expected in the nanopore sequencing assay. As shown in Fig. 4B, sequence variants due to  
201 inaccurate base calling were distributed in these reads, including prefix, suffix, and CGG  
202 repeat sequences, resulting in the miscalculation of CGG repeat numbers in the subsequent  
203 data analysis processes. We analyzed the Fastq data (i.e., data after base calling) for N1/P2  
204 and N1/P5 reference samples derived from the CAFXS assay using our data analysis software,  
205 and the reported CGG repeat numbers of these reference samples were concordant between  
206 our data analysis pipeline and the CAFXS assay (Supplemental Fig. 1) confirming the  
207 accuracy of post-base-calling processes using our data analysis software. Lastly, we  
208 reanalyzed N1/P2 and N1/P5 reference samples based on sequencing data derived from the  
209 sense and antisense strands, respectively, and confirmed that there was no strand bias in CGG  
210 repeat quantification (Fig. 4C). Collectively, the observed variations in CGG repeat  
211 quantification are thus mainly attributed to inaccurate base-calling.

## 212 **NANOPORE SEQUENCING DEMONSTRATES NO SIZE PREFERENCES FOR** 213 **AMPLICONS WITH DIFFERENT CGG REPEATS**

214 Although the nanopore sequencing assay could detect FXS carriers with a wide range of  
215 expanded alleles, we noticed that for a specific carrier, the read ratios of expanded alleles  
216 versus their wild-type counterparts tended to decrease with increasing allelic expansion (Fig.  
217 4D). We thus evaluated whether the short amplicons of the wild-type alleles more readily  
218 passed through the nanopore than the longer amplicons of the expanded alleles. Two libraries  
219 derived from reference samples, N1 (29 CGG repeats) and P5 (55 CGG repeats) were pooled  
220 in equimolar amounts and sequenced. The read ratio of P5 to N1 was approximately 1.06,  
221 suggesting that there was no size preference for amplicons with different CGG repeats

222 (Supplemental Fig. 2). Moreover, we compared the read ratios of the expanded alleles with  
223 their wild-type counterparts using single-plex, 10-plex, and 100-plex nanopore sequencing  
224 assays. As shown in Fig. 4E, the read ratios of each sample were similar among the three  
225 assays, suggesting that in the presence of different wild-type backgrounds, large amounts of  
226 short amplicons did not skew the target size-indiscriminative characteristics of nanopore  
227 sequencing. Finally, we evaluated the same samples on different nanopore sequencing  
228 platforms, namely MinION and PromethION, which had 1190 and 8657 active nanopores on  
229 their flow cells at the beginning of sequencing, respectively. As shown in Fig. 4F, the read  
230 ratios were similar between the two platforms, suggesting that the target-size indiscriminatory  
231 characteristics of nanopore sequencing were not influenced by the number of active  
232 nanopores in the flow cells.

### 233 **PRELIMINARY VALIDATION OF CLINICAL UTILITY OF NANOPORE** 234 **SEQUENCING ASSAY FOR THE FXS CARRIER SCREENING**

235 To validate the clinical utility of the nanopore sequencing assay for FXS carrier screening, we  
236 analyzed 10 female clinical samples using a 10-plex nanopore sequencing assay. Considering  
237 the variations in CGG repeat quantification, when an allele with  $\geq 54$  CGG repeats was  
238 identified, an alert would be triggered designating a carrier. These samples were analyzed in  
239 parallel with CAFXS assay data. As shown in Table 2 and Supplemental Fig. 3, three carriers  
240 were identified using the nanopore sequencing assay, concordant with the results of the  
241 CAFXS assays.

### 242 **Discussion**

243 Given that the value of population-based FXS carrier screening has been acknowledged (10),

244 appropriate screening methods are urgently needed to implement such screening programs. A  
245 favorable testing method should be able to examine large-scale samples with high accuracy,  
246 low cost, short turnaround times, and ease of performance. Our nanopore sequencing assay  
247 would be one option that can meet these demands. First, we developed reliable and  
248 user-friendly software to facilitate sequencing data analysis and output results. Second, using  
249 reference and clinical samples, we demonstrated that the nanopore sequencing assay was able  
250 to identify the full range of premutation *FMRI* alleles, which account for the majority of FXS  
251 carriers, and the nanopore sequencing assay was able to reliably quantify CGG repeats and  
252 AGG interruptions, which are two important determinants for assessing the risk of full  
253 mutation expansion in carriers, thus facilitating genetic counseling for carrier screening. Third,  
254 using identifier sequences, we tested multiple samples in one assay, dramatically increasing  
255 test capacity and decreasing cost. In our 100-plex assay, the cost per sample was less than  
256 USD 10. Moreover, nanopore sequencing demonstrated no size preferences for amplicons  
257 with different CGG repeats, suggesting that the detection of expanded alleles will not be  
258 compromised by wild-type allele abundance as long as sufficient data are collected for each  
259 sample, while tens of thousands of identifier sequences are available in the form of different  
260 short combinations of nucleotides. In this regard, we could further increase sample capacity  
261 and decrease cost per sample by collecting more data using an advanced nanopore sequencing  
262 platform, such as PromethION. Fourth, the nanopore sequencing assay can be easily  
263 accomplished with a short turnaround time (for example, a 100-plex assay requires  
264 approximately two days) by a technician in a regular molecular diagnostics laboratory. Lastly,  
265 in comparison with TP-PCR and CAFXS, the equipment for nanopore sequencing assays is

266 more available and portable, and thus could be more readily and widely adapted, particularly  
267 in underdeveloped regions of the world (22).

268 In comparison with NGS or PacBio-based long-read sequencing, nanopore sequencing  
269 has a relatively higher sequencing error rate in single reads owing to inaccuracies in ionic  
270 current signal-to-nucleotide sequence translation (i.e., the base calling process) (22). This  
271 innate error would cause one to several copy number variations during quantification of CGG  
272 repeats in our nanopore assays, which may cause misclassification of subjects whose CGG  
273 repeat numbers are near the boundary between intermediate and premutation alleles.  
274 Technical limitation-associated variations in CGG repeat sizing are common to most methods  
275 and are allowed to a certain extent in technical standards (4). The accuracy of CGG repeat  
276 sizing can be improved, rendering it not a major concern in the use of our nanopore  
277 sequencing assay. For example, base calling is educable with machine learning models, and  
278 its accuracy continuously increases with the accumulation of nanopore sequencing data  
279 (23-25). Even at the current stage, a reference sample, such as N1/P5, can be used as a  
280 quantitative control to monitor variation in base calling and direct the threshold setting for  
281 carrier identification.

282 In comparison with amplification-free methods (15, 18), amplification of *FMRI* alleles  
283 drastically increases the sequencing depth of the target region and decreases costs. However,  
284 owing to the high GC content of the target region and competitive effects of wild-type alleles,  
285 the amplification efficiencies of expanded alleles tend to decrease with increasing allelic  
286 expansion (4). In this study, carriers with a full range of premutation alleles were identified by  
287 our nanopore sequencing assay; however, carriers with full mutation alleles, which constitute

288 approximately 3% of FXS carriers (9), could be missed by our assay. This issue can be  
289 partially resolved by further optimizing the amplification system through the optimization of  
290 reagents or reaction conditions. While the sensitivity of mosaicism detection has not been  
291 systematically examined because its clinical significance in carrier screening remains unclear,  
292 this sensitivity could be compared between nanopore sequencing and TP-PCR (~5-10%) (26)  
293 using the mosaicism detection results of reference sample P3.

294 In conclusion, we developed a nanopore sequencing-based assay to identify FXS carriers  
295 that includes data analysis software. This assay was demonstrated to be rapid, high-capacity,  
296 inexpensive, and easy to perform, thus providing a promising tool for population-based FXS  
297 carrier screening.

#### 298 **Conflict of interest**

299 None

#### 300 **Research Funding**

301 This work was supported by the National Natural Science Foundation of China [grant  
302 numbers 82071662] and the Natural Science Foundation of Xiamen Municipality [grant  
303 numbers 3502Z20227141] .

#### 304 **Acknowledgement**

305 We thank all the clinical participants, and I-Fan Chiu, Maoli Chen, Sihao Wu, Hanwei Wang,  
306 and Lingfeng Mao for their kind supports to this work.

#### 307 **References**

308 1. Mila M, Alvarez-Mora MI, Madrigal I, Rodriguez-Revenga L. Fragile x syndrome: An  
309 overview and update of the *fmr1* gene. *Clinical Genetics* 2017;93:2:197-205 doi:

- 310 10.1111/cge.13075.
- 311 2. Lozano R, Azarang A, Wilaisakditipakorn T, Hagerman RJ. Fragile x syndrome: A review  
312 of clinical management. *Intractable & Rare Diseases Research* 2016;5:3:145-57 doi:  
313 10.5582/irdr.2016.01048.
- 314 3. Pieretti M, Zhang F, Fu Y-H, Warren ST, Oostra BA, Caskey CT, et al. Absence of  
315 expression of the *fmr-1* gene in fragile x syndrome. *Cell* 1991;66:4:817-22 doi:  
316 10.1016/0092-8674(91)90125-i.
- 317 4. Spector E, Behlmann A, Kronquist K, Rose NC, Lyon E, Reddi HV. Laboratory testing for  
318 fragile x, 2021 revision: A technical standard of the american college of medical genetics  
319 and genomics (acmg). *Genet Med* 2021;23:5:799-812. Epub 20210401 doi:  
320 10.1038/s41436-021-01115-y.
- 321 5. Committee opinion no. 691: Carrier screening for genetic conditions. *Obstet Gynecol*  
322 2017;129:3:e41-e55. Epub 2017/02/23 doi: 10.1097/AOG.0000000000001952  
323 00006250-201703000-00048 [pii].
- 324 6. Zlotogora J, Grotto I, Kaliner E, Gamzu R. The israeli national population program of  
325 genetic carrier screening for reproductive purposes. *Genetics in Medicine* 2016;18:2:203-6  
326 doi: 10.1038/gim.2015.55.
- 327 7. Westemeyer M, Saucier J, Wallace J, Prins SA, Shetty A, Malhotra M, et al. Clinical  
328 experience with carrier screening in a general population: Support for a comprehensive  
329 pan-ethnic approach. *Genetics in Medicine* 2020;22:8:1320-8 doi:  
330 10.1038/s41436-020-0807-4.
- 331 8. Archibald AD, Smith MJ, Burgess T, Scarff KL, Elliott J, Hunt CE, et al. Reproductive



- 332 genetic carrier screening for cystic fibrosis, fragile x syndrome, and spinal muscular  
333 atrophy in australia: Outcomes of 12,000 tests. *Genet Med* 2018;20:5:513-23. Epub  
334 20171026 doi: 10.1038/gim.2017.134.
- 335 9. Guo Q, Chang YY, Huang CH, Hsiao YS, Hsiao YC, Chiu IF, et al. Population-based  
336 carrier screening and prenatal diagnosis of fragile x syndrome in east asian populations. *J*  
337 *Genet Genomics* 2021;48:12:1104-10. Epub 20210607 doi: 10.1016/j.jgg.2021.04.012.
- 338 10. Gregg AR, Aarabi M, Klugman S, Leach NT, Bashford MT, Goldwaser T, et al. Screening  
339 for autosomal recessive and x-linked conditions during pregnancy and preconception: A  
340 practice resource of the american college of medical genetics and genomics (acmg).  
341 *Genetics in Medicine* 2021;23:10:1793-806 doi: 10.1038/s41436-021-01203-z.
- 342 11. Dimmock DP. Should we implement population screening for fragile x? *Genetics in*  
343 *Medicine* 2017;19:12:1295-9 doi: 10.1038/gim.2017.81.
- 344 12. Metcalfe SA, Delatycki MB, Cohen J, Archibald AD, Emery JD. Fragile x population  
345 carrier screening. *Genetics in Medicine* 2018;20:9:1091-2 doi: 10.1038/gim.2017.209.
- 346 13. Metcalfe SA, Martyn M, Ames A, Anderson V, Archibald AD, Carter R, et al. Informed  
347 decision making and psychosocial outcomes in pregnant and nonpregnant women offered  
348 population fragile x carrier screening. *Genetics in Medicine* 2017;19:12:1346-55 doi:  
349 10.1038/gim.2017.67.
- 350 14. Juusola JS, Anderson P, Sabato F, Wilkinson DS, Pandya A, Ferreira-Gonzalez A.  
351 Performance evaluation of two methods using commercially available reagents for  
352 pcr-based detection of fmr1 mutation. *J Mol Diagn* 2012;14:5:476-86. Epub 20120702 doi:  
353 10.1016/j.jmoldx.2012.03.005.

- 354 15. Giesselmann P, Brändl B, Raimondeau E, Bowen R, Rohrandt C, Tandon R, et al.  
355 Analysis of short tandem repeat expansions and their methylation state with nanopore  
356 sequencing. *Nat Biotechnol* 2019;37:12:1478-81. Epub 20191118 doi:  
357 10.1038/s41587-019-0293-x.
- 358 16. Liang Q, Liu Y, Duan R, Meng W, Zhan J, Xia J, et al. Comprehensive analysis of fragile  
359 x syndrome: Full characterization of the *fmr1* locus by long-read sequencing. *Clin Chem*  
360 2022;68:12:1529-40. Epub 2022/09/29 doi: 10.1093/clinchem/hvac154  
361 6726663 [pii].
- 362 17. Ardui S, Race V, Zablotskaya A, Hestand MS, Van Esch H, Devriendt K, et al. Detecting  
363 agg interruptions in male and female *fmr1* premutation carriers by single-molecule  
364 sequencing. *Human Mutation* 2017;38:3:324-31 doi: 10.1002/humu.23150.
- 365 18. Stevanovski I, Chintalaphani SR, Gamaarachchi H, Ferguson JM, Pineda SS, Scriba CK,  
366 et al. Comprehensive genetic diagnosis of tandem repeat expansion disorders with  
367 programmable targeted nanopore sequencing. *Sci Adv* 2022;8:9:eabm5386. Epub 20220304  
368 doi: 10.1126/sciadv.abm5386.
- 369 19. Loomis EW, Eid JS, Peluso P, Yin J, Hickey L, Rank D, et al. Sequencing the  
370 unsequenceable: Expanded cgg-repeat alleles of the fragile x gene. *Genome Research*  
371 2013;23:1:121-8 doi: 10.1101/gr.141705.112.
- 372 20. Amos Wilson J, Pratt VM, Phansalkar A, Muralidharan K, Highsmith WE, Beck JC, et al.  
373 Consensus characterization of 16 *fmr1* reference materials: A consortium study. *The Journal*  
374 *of Molecular Diagnostics* 2008;10:1:2-12 doi: 10.2353/jmoldx.2008.070105.
- 375 21. Gao F, Huang W, You Y, Huang J, Zhao J, Xue J, et al. Development of chinese genetic

- 376 reference panel for fragile x syndrome and its application to the screen of 10,000 chinese  
377 pregnant women and women planning pregnancy. *Molecular Genetics & Genomic*  
378 *Medicine* 2020;8:6 doi: 10.1002/mgg3.1236.
- 379 22. Ameer A, Kloosterman WP, Hestand MS. Single-molecule sequencing: Towards clinical  
380 applications. *Trends in Biotechnology* 2019;37:1:72-85 doi: 10.1016/j.tibtech.2018.07.013.
- 381 23. Singh G, Alser M, Denolf K, Firtina C, Khodamoradi A, Cavlak MB, et al. Rubicon: A  
382 framework for designing efficient deep learning-based genomic basecallers. *Genome*  
383 *Biology* 2024;25:1 doi: 10.1186/s13059-024-03181-2.
- 384 24. Amarasinghe SL, Su S, Dong X, Zappia L, Ritchie ME, Gouil Q. Opportunities and  
385 challenges in long-read sequencing data analysis. *Genome Biology* 2020;21:1 doi:  
386 10.1186/s13059-020-1935-5.
- 387 25. Alser M, Lindegger J, Firtina C, Almadhoun N, Mao H, Singh G, et al. From molecules to  
388 genomic variations: Accelerating genome analysis via intelligent algorithms and  
389 architectures. *Computational and Structural Biotechnology Journal* 2022;20:4579-99 doi:  
390 10.1016/j.csbj.2022.08.019.
- 391 26. Hantash FM, Goos DG, Tsao D, Quan F, Buller-Burckle A, Peng M, et al. Qualitative  
392 assessment of fmr1 (cgg)n triplet repeat status in normal, intermediate, premutation, full  
393 mutation, and mosaic carriers in both sexes: Implications for fragile x syndrome carrier and  
394 newborn screening. *Genetics in Medicine* 2010;12:3:162-73 doi:  
395 10.1097/GIM.0b013e3181d0d40e.

396 **Figure 1. Flowchart of screen for fragile X syndrome carriers using our nanopore**  
397 **sequencing assay.**

398 **Figure 2. Comparison of nanopore sequencing, TP-PCR, and CAFXS for detection of**  
399 **different FXS carrier reference samples.**

400 **Figure 3. Detection of FXS carriers within wildtype backgrounds with multiplex**  
401 **nanopore sequencing assay.** (A) Efficacy of ten pairs of primers labeled with different  
402 identifier sequences was validated by amplification of wildtype samples. (B-G) CGG repeat  
403 numbers associated with reference samples in the 10-plex nanopore sequencing assay.  
404 (H-M) CGG repeat numbers associated with reference samples in the 100-plex nanopore  
405 sequencing assay.

406 **Figure 4. Evaluation of length variation and length preference of the nanopore**  
407 **sequencing assay.** (A) Slight variations were observed in reported CGG repeat numbers for  
408 expanded alleles in reference samples among single-plex, 10-plex, and 100-plex nanopore  
409 sequencing assays. (B) Representative reads with sequence variants due to inaccurate base  
410 calling. (C) Reported CGG repeat numbers of expanded alleles were identical based on  
411 reads derived from forward and reverse strands, respectively. (D) Read ratios of expanded  
412 alleles versus their wild-type counterparts tend to decrease with increasing allelic expansion.  
413 Error bars indicate standard deviation among triplicate samples. (E) Reads ratios of  
414 expanded alleles versus their wildtype counterparts were similar among single-plex,  
415 10-plex, and 100-plex nanopore sequencing assays. (F) Reads ratios of expanded alleles  
416 versus their wildtype counterparts were similar between MinION and PromethION  
417 platforms whose respective flow cells had 1190 and 8657 active nanopores.

418 **Table 1. Comparison of nanopore sequencing, TP-PCR, and CAFXS for the detection of different FXS carrier reference samples.**

| Sample  | Manufacturer's instruction | CGG repeat number |          |            |        | AGG interruption |         |                  |              |
|---------|----------------------------|-------------------|----------|------------|--------|------------------|---------|------------------|--------------|
|         |                            | TP-PCR            | TP-PCR   | Nanopore   | CAFXS  | TP-PCR           | TP-PCR  | Nanopore         | CAFXS        |
|         |                            | Asuragen          | Biofast  | sequencing |        | Asuragen         | Biofast | sequencing       |              |
| N1/P2   | 29±1/54                    | 29/54             | 29/54    | 29/53      | 29/54  | 2AGG             | 2AGG    | 9A9A9/none       | 9A9A9/none   |
| N1/P5   | 29±1/56±1                  | 29/55             | 29/55    | 29/54      | 29/55  | 3AGG             | 3AGG    | 9A9A9/11A42      | 9A9A9/11A43  |
| P3      | 30±1/69±3                  | 30/54/67          | 30/54/67 | 30/53/66   | 30/67  | 2AGG             | 2AGG    | 10A9A9/none/none | 10A9A9/none  |
| NA06968 | 32/107                     | 33/111            | 33/111   | 33/110     | 33/113 | 1AGG             | 1AGG    | 9A23/none        | 9A23/none    |
| P4      | 29±1/155±5                 | 30/156            | 30/156   | 30/155     | 30/153 | 2AGG             | 2AGG    | 10A9A9/none      | 10A9A9/none  |
| NA20239 | 20/183-193                 | 20/>200           | 20/>200  | 20/203     | 20/202 | 3AGG             | 3AGG    | 10A9/9A9A183     | 10A9/9A9A182 |

419



420 **Table 2. Evaluation of nanopore sequencing assay with clinical samples**

| Sample | CGG repeat number   |        | AGG interruption    |                    |
|--------|---------------------|--------|---------------------|--------------------|
|        | Nanopore sequencing | CAFXS  | Nanopore sequencing | CAFXS              |
| 1*     | 36/151              | 36/153 | 9A9A6A9/9A141       | 9A9A6A9/9A143      |
| 2      | 33/50               | 33/51  | 9A6A6A9/10A39       | 9A6A6A9/10A40      |
| 3      | 29/52               | 29/53  | 9A9A9/9A9A5A9A6A9   | 9A9A9/9A9A6A9A6A9  |
| 4*     | 29/54               | 29/55  | 9A9A9/9A9A10A6A6A9  | 9A9A9/9A9A11A6A6A9 |
| 5*     | 36/60               | 36/61  | 9A9A6A9/10A49       | 9A9A6A9/10A50      |
| 6      | 29/29               | 29/29  | 9A9A9/9A9A9         | 9A9A9/9A9A9        |
| 7      | 20/30               | 20/30  | 10A9/none           | 10A9/none          |
| 8      | 29/29               | 29/29  | 9A9A9/9A9A9         | 9A9A9/9A9A9        |
| 9      | 36/36               | 36/36  | 9A9A6A9/9A16A9      | 9A9A6A9/9A16A9     |
| 10     | 26/29               | 26/29  | 10A9A5/9A9A9        | 10A9A5/9A9A9       |

421 \*FXS carrier

## Pre-sequencing preparation

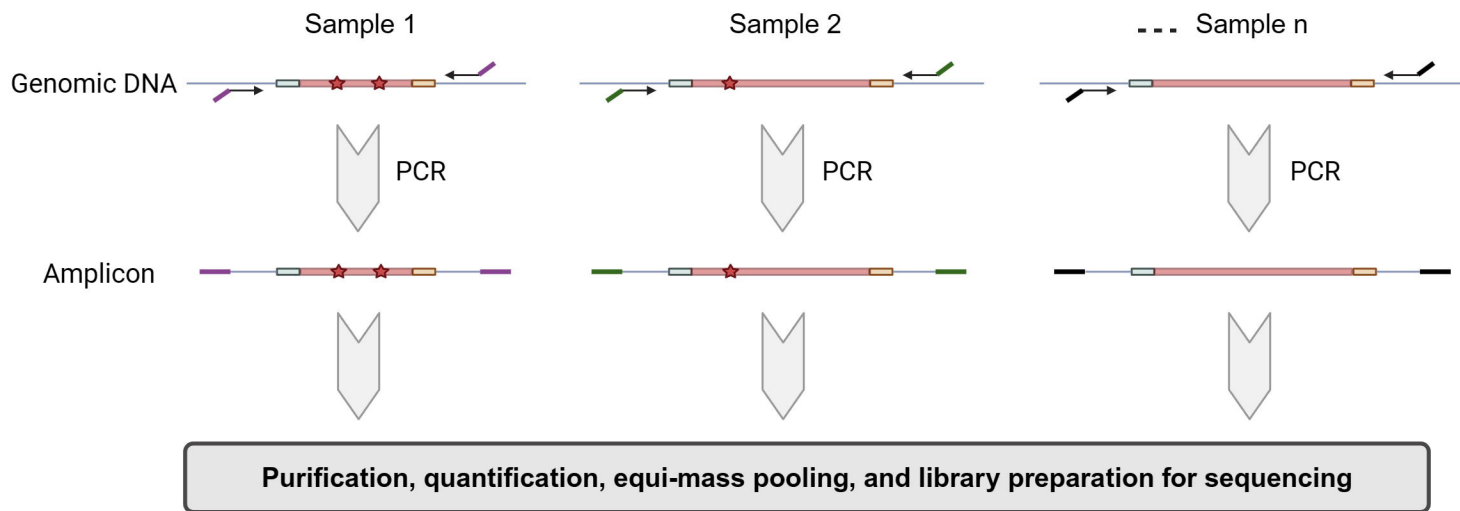

## Nanopore sequencing

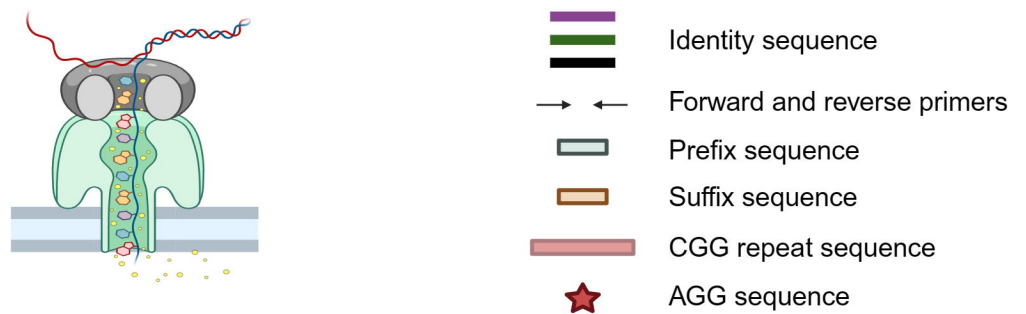

## Post-sequencing data analysis

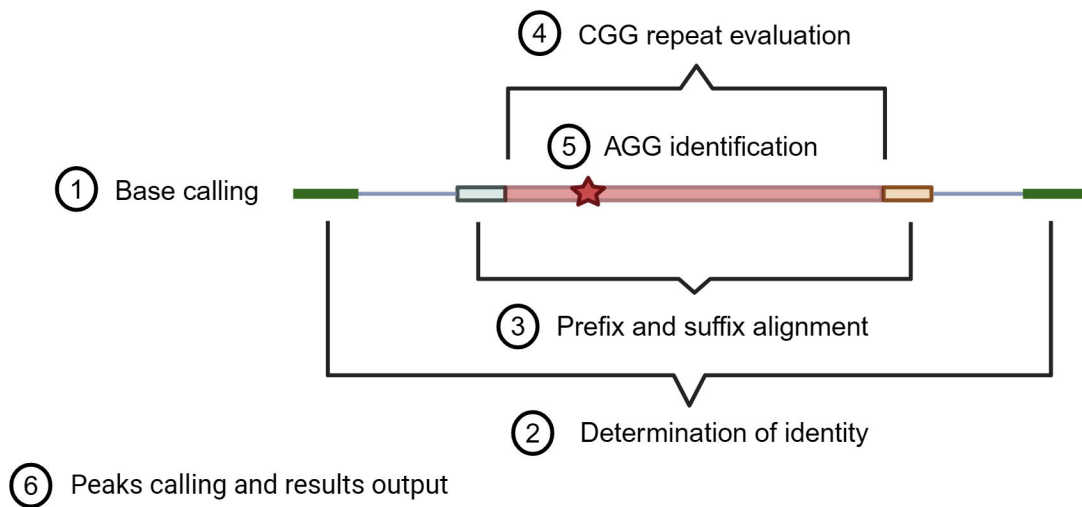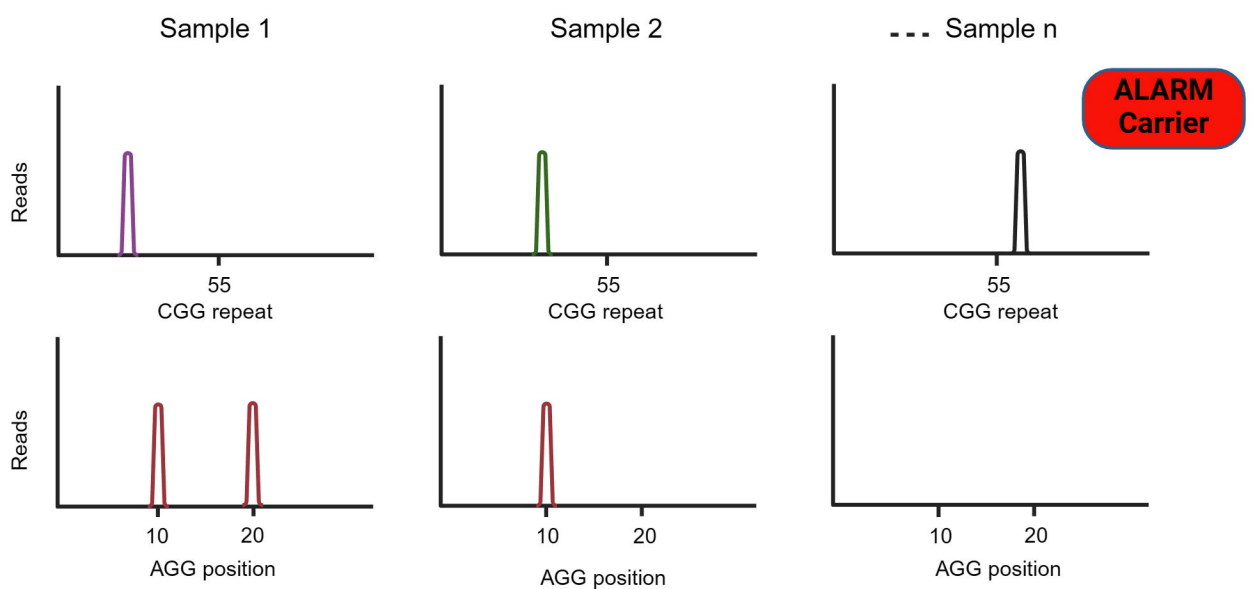

# Nanopore sequencing

# TP-PCR

# CAFXS

N1/P2

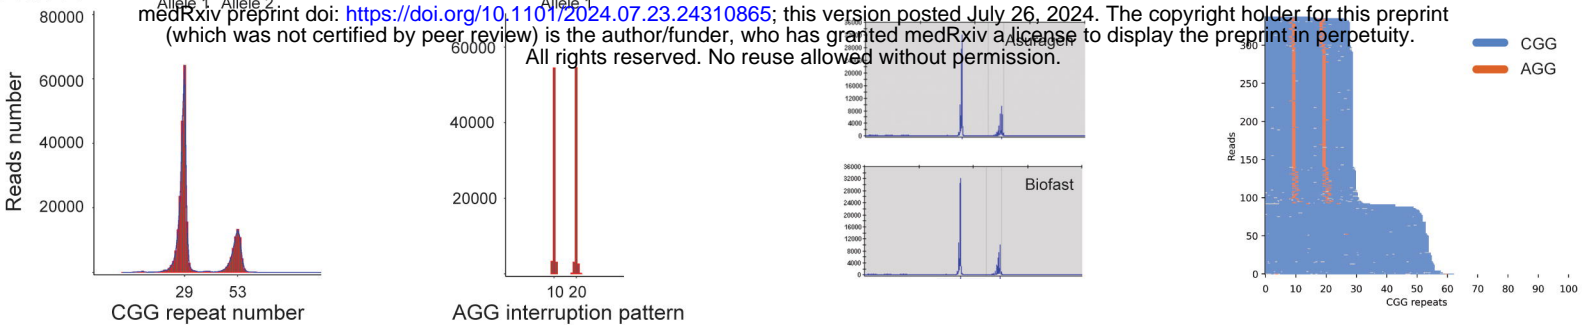

N1/P5

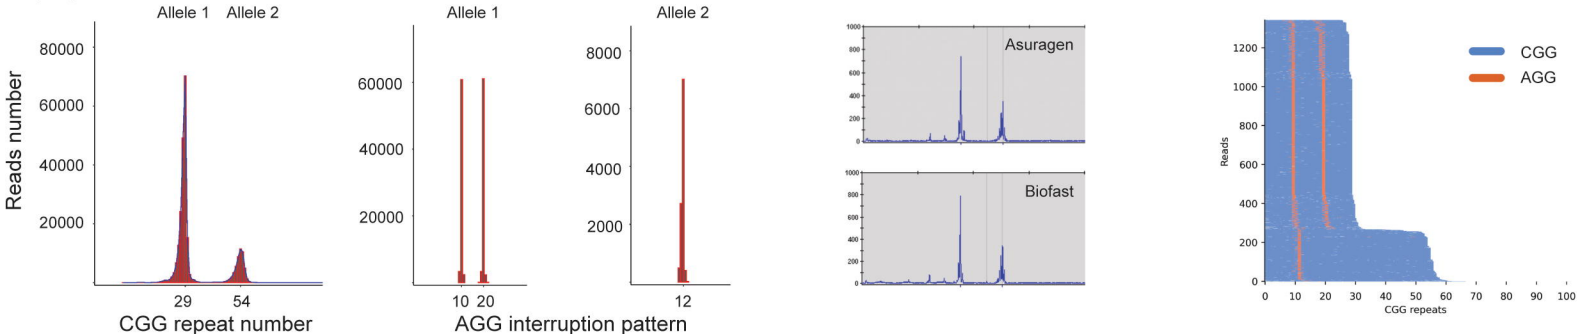

P3

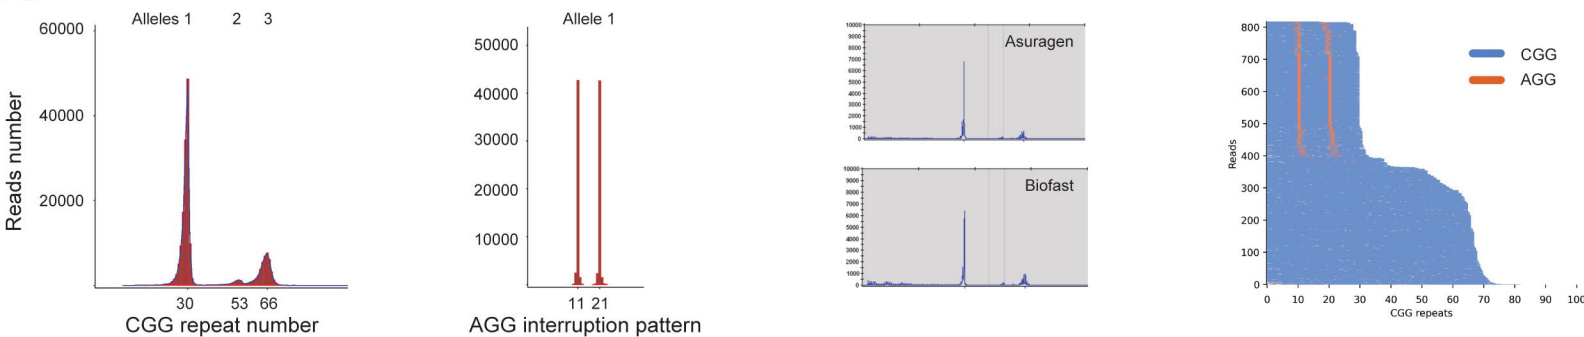

NA06968

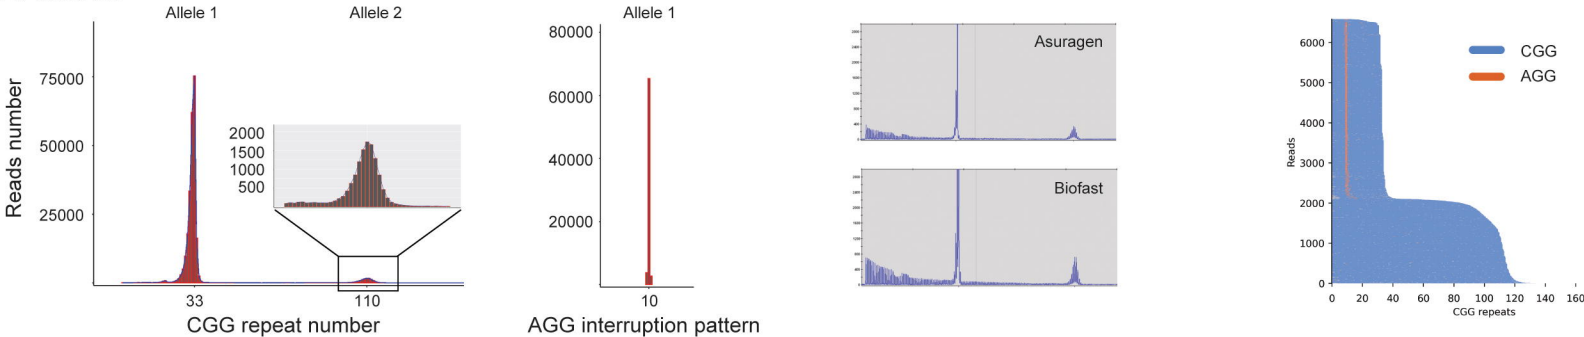

P4

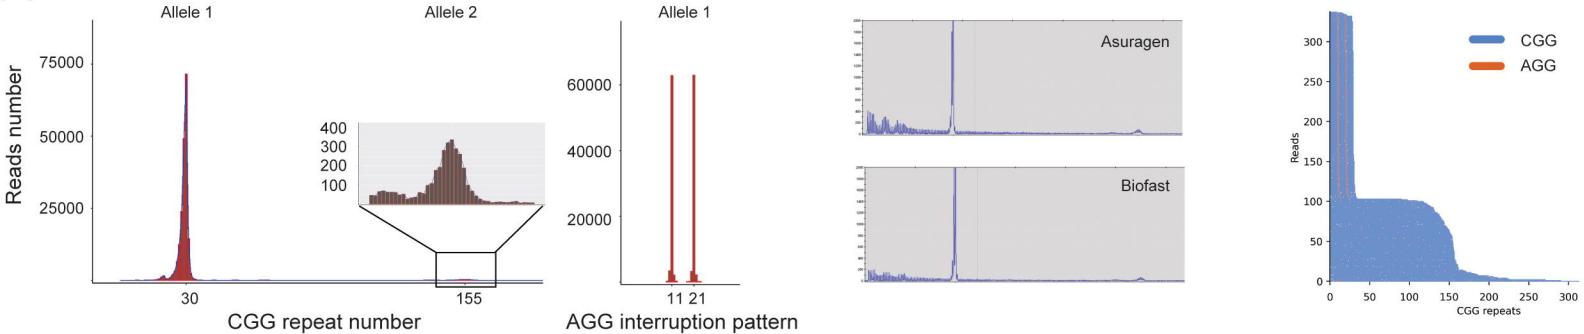

NA20239

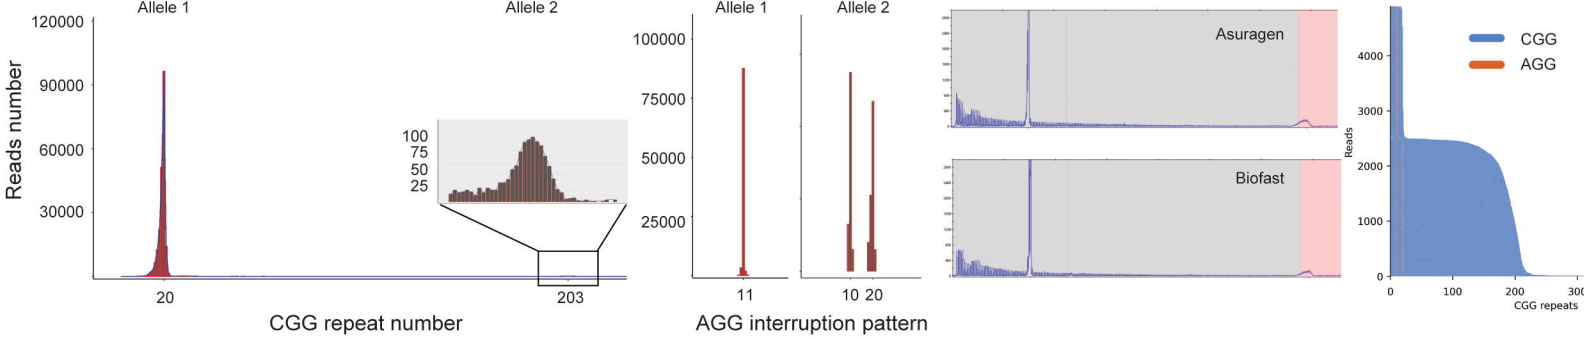

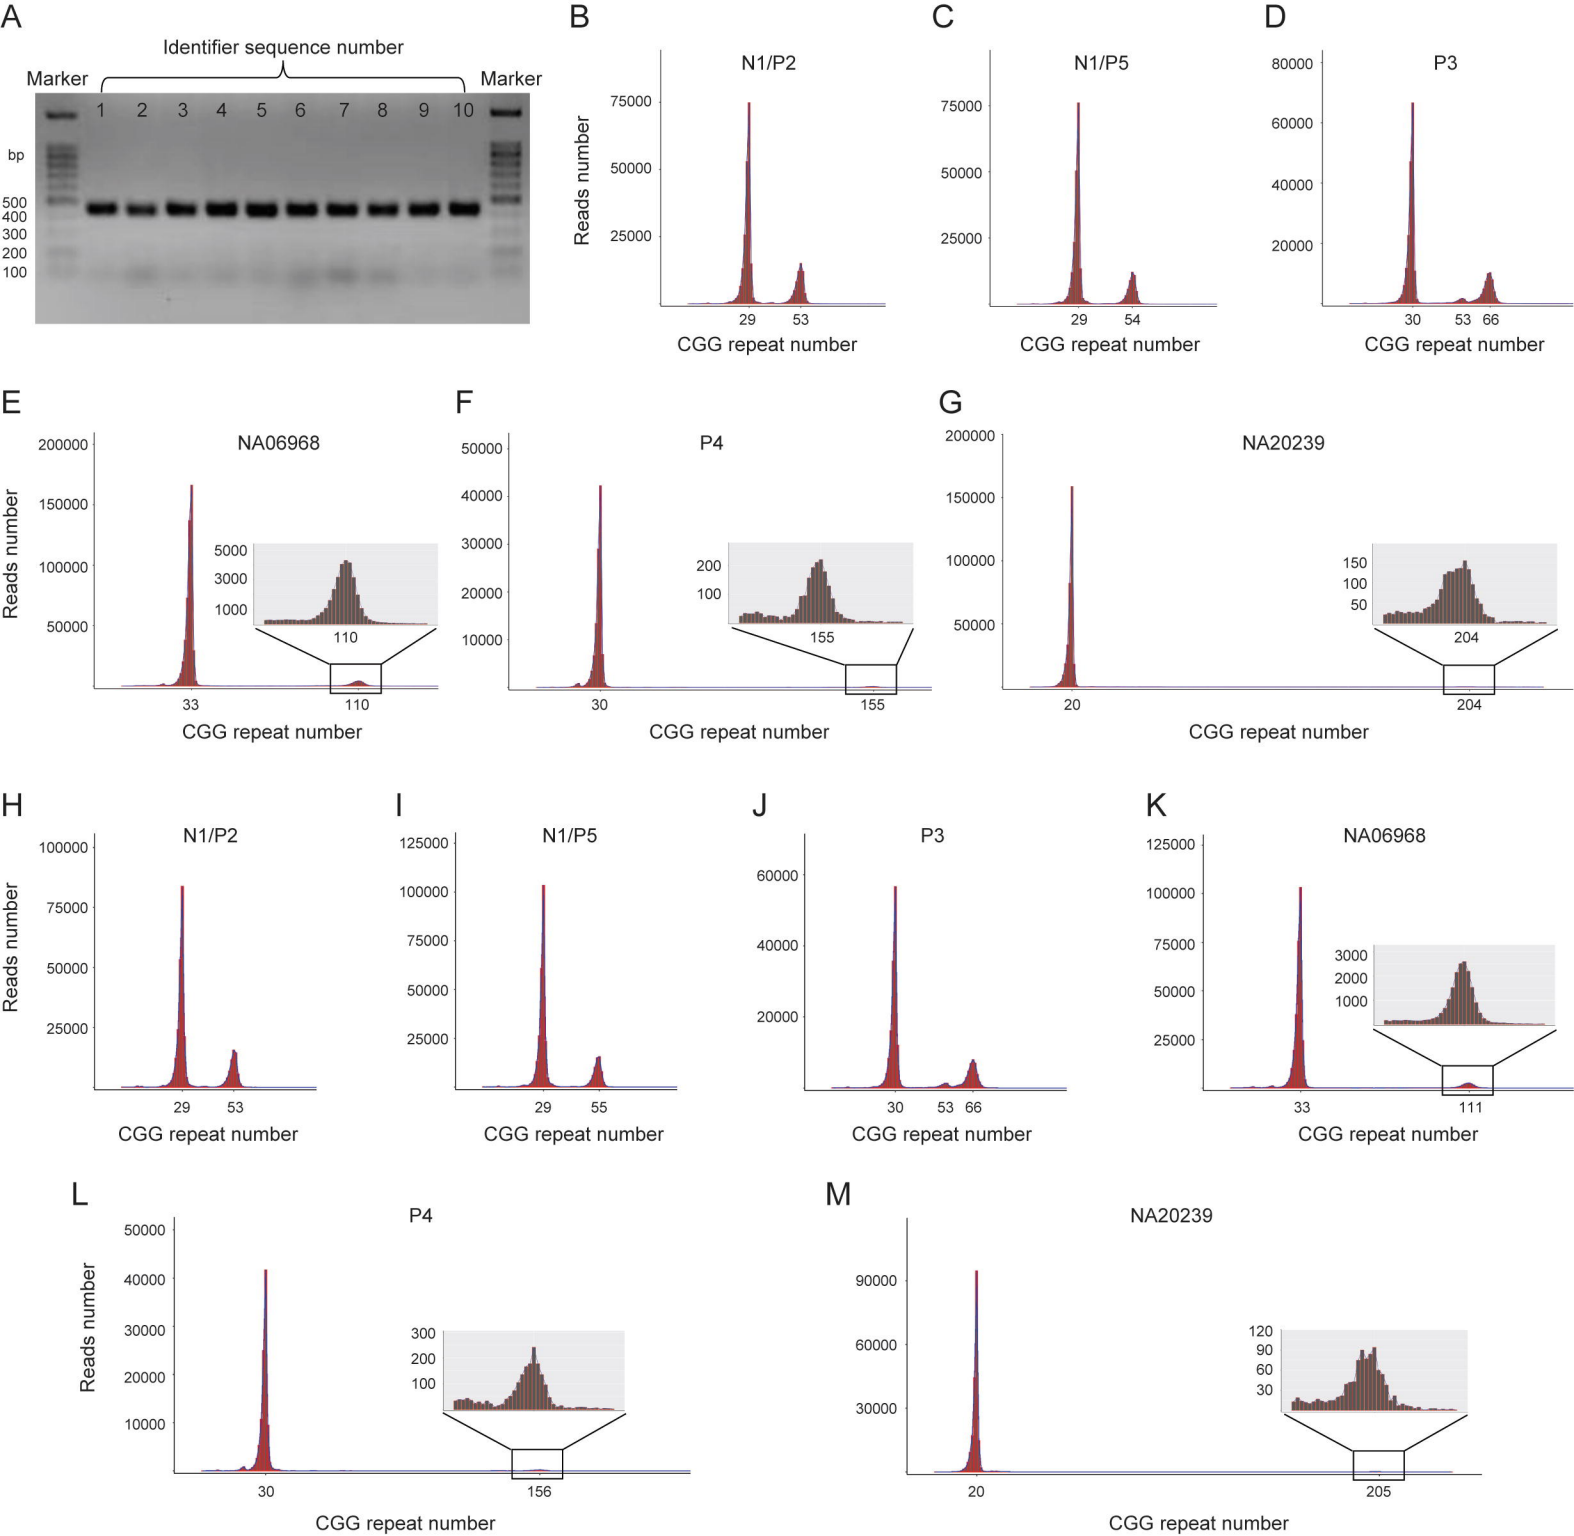

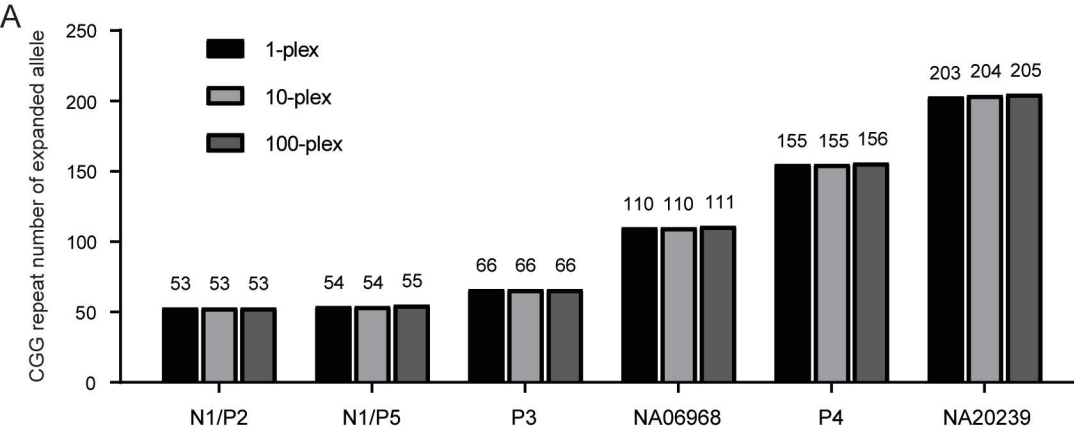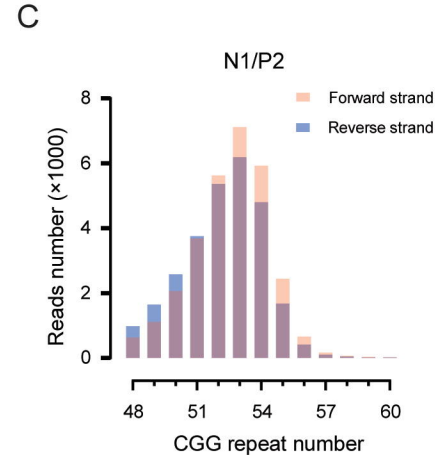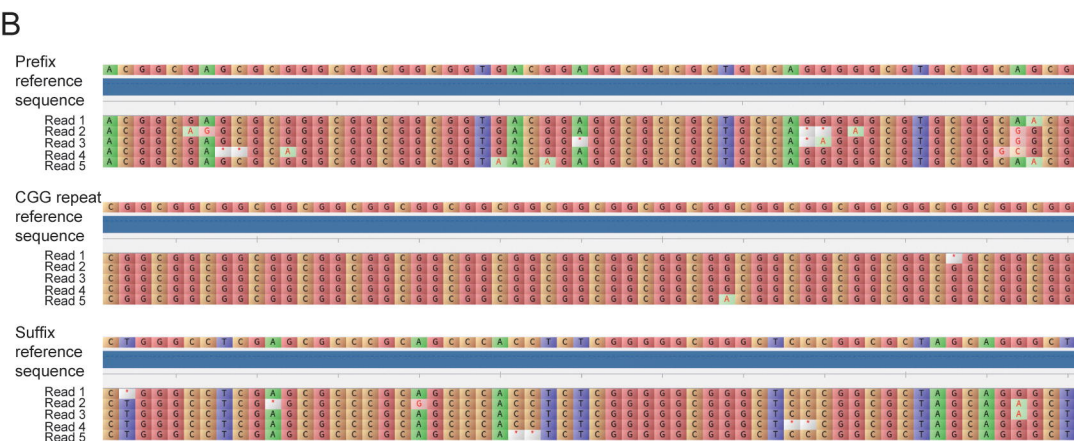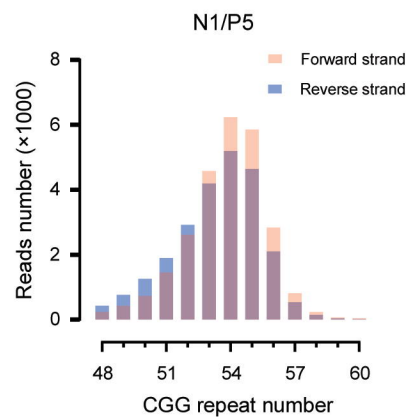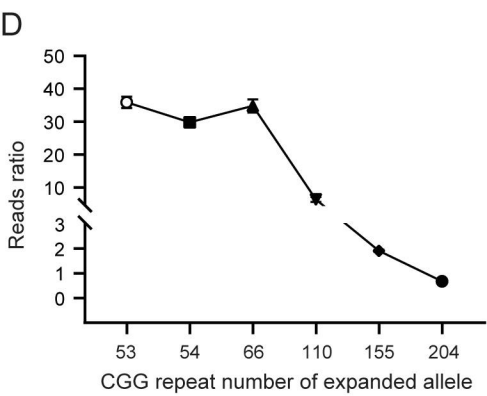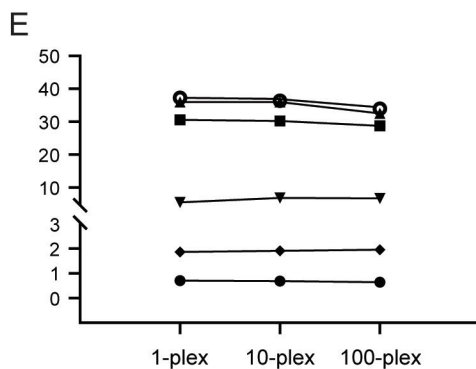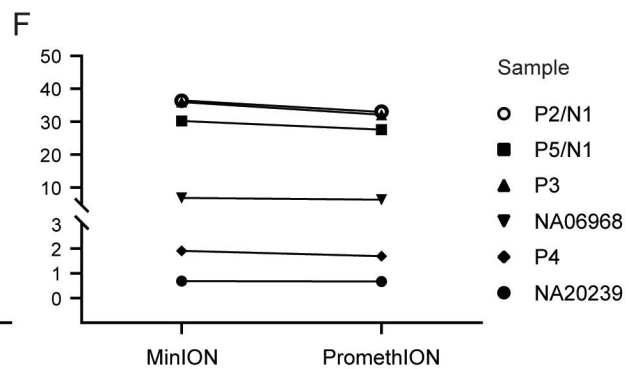

Source: https://medrxiv.org/content/medrxiv/early/2024/07/26/2024.07.23.24310865.full.pdf
